# Supplementary material
Source: PubMed Central journal article supplement (PMC518791)
Supplement: pnas_101_37_13531__2.pdf [file pnas_101_37_13531__2.pdf]

**Table 2. Maximal variable fluorescence ( $F_v/F_m$ ) and electron-transfer rates ( $\tau$ ) from the primary electron acceptor in photosystem II,  $Q_A$ , to the secondary quinone,  $Q_B$**

| Clone name    | Temperature,<br>°C | $n$ | $F_v/F_m$       | Electron turnover<br>time, $\mu$ s | $\tau$       |
|---------------|--------------------|-----|-----------------|------------------------------------|--------------|
| CCMP no. 828  | 26                 | 3   | $0.60 \pm 0.02$ | $311 \pm 17$                       |              |
| CCMP no. 828  | 32                 | 3   | $0.62 \pm 0.01$ | $330 \pm 17$                       |              |
| CCMP no. 830  | 26                 | 3   | $0.58 \pm 0.01$ | $331 \pm 37$                       |              |
| CCMP no. 830  | 32                 | 3   | $0.53 \pm 0.01$ | $352 \pm 11$                       |              |
| CCMP no. 421  | 26                 | 5   | $0.49 \pm 0.01$ | $287 \pm 27$                       |              |
| CCMP no. 421  | 32                 | 3   | $0.44 \pm 0.06$ | $338 \pm 37$                       |              |
| EIL2          | 26                 | 3   | $0.59 \pm 0.01$ | $344 \pm 15$                       |              |
| EIL2          | 32                 | 5   | $0.62 \pm 0.01$ | $347 \pm 14$                       |              |
| CCMP no. 1633 | 26                 | 3   | $0.49 \pm 0.01$ | $290 \pm 6$                        |              |
| CCMP no. 1633 | 32                 | 3   | $0.38 \pm 0.01$ | $246 \pm 33$                       |              |
| CCMP no. 827  | 26                 | 5   | $0.48 \pm 0.04$ | $279 \pm 12$                       |              |
| CCMP no. 827  | 32                 | 3   | $0.30 \pm 0.01$ | $141 \pm 19$                       |              |
| CCMP no. 831  | 26                 | 3   | $0.52 \pm 0.01$ | $344 \pm 8$                        |              |
| CCMP no. 831  | 32                 | 3   | $0.24 \pm 0.01$ | $214 \pm 16$                       |              |
| Averages      |                    |     |                 |                                    |              |
| Tolerant      | 26                 |     | $0.57 \pm 0.05$ |                                    | $318 \pm 24$ |
| Tolerant      | 32                 |     | $0.55 \pm 0.01$ |                                    | $341 \pm 9$  |
| Sensitive     | 26                 |     | $0.50 \pm 0.07$ |                                    | $304 \pm 54$ |
| Sensitive     | 32                 |     | $0.31 \pm 0.03$ |                                    | $200 \pm 46$ |

The data were obtained with a custom-built tabletop fast repetition-rate fluorometer, and the data were analyzed as described [Kolber, Z. S., Prasil, O. & Falkowski, P. G. (1998) *Biochim. Biophys. Acta* **1367**, 88–106]. All cultures were grown in F/2 medium; cultures were incubated for 168 h under a 10/14-h light/dark cycle at 26 and 32°C for each species tested. The average variable fluorescence ( $F_v/F_m$ ) and electron-transfer rates ( $\tau$ ) from both tolerant and sensitive species are summed under “Averages.” CCMP, Provasoli-Guillard National Center for Culture of Marine Phytoplankton West Boothbay Harbor, ME); EIL, Elat clone 2.
