# Supplementary material
Source: PubMed Central journal article supplement (PMC518791)
Supplement: pnas_101_37_13531__3.pdf [file pnas_101_37_13531__3.pdf]

**Table 3. The lipid composition of the different clones of *Symbiodinium* and from freshly isolated zooxanthellae obtained from corals**

|                             | Temperature,<br>°C | 18:1         | 18:2        | 18:3        | 18:4         | 16:0 |
|-----------------------------|--------------------|--------------|-------------|-------------|--------------|------|
| Clone name                  |                    |              |             |             |              |      |
| CCMP no. 828                | 26                 | 16.19 ± 0.06 | 1.76 ± 0.01 | 2.02 ± 0.01 | 18.60 ± 0.18 |      |
| CCMP no. 830                | 26                 | 16.19 ± 0.06 | 1.76 ± 0.01 | 2.02 ± 0.01 | 18.60 ± 0.18 |      |
| CCMP no. 421                | 26                 | 11.45 ± 0.89 | 1.2 ± 0.01  | 0.82 ± 0.02 | 9.42 ± 0.04  |      |
| EIL2                        | 26                 | 15.94 ± 0.83 | 8.38 ± 0.09 | 1.69 ± 0.06 | 5.95 ± 0.69  |      |
| EIL2                        | 32                 | 15.53 ± 0.77 | 7.70 ± 0.26 | 1.79 ± 0.04 | 6.82 ± 0.40  |      |
| CCMP no. 1633               | 26                 | 8.21 ± 0.58  | 0.75 ± 0.05 | 0.12 ± 0.18 | 29.66 ± 0.19 |      |
| CCMP no. 827                | 26                 | 4.34 ± 0.87  | 2.67 ± 1.08 | 2.74 ± 0.04 | 16.99 ± 0.44 |      |
| CCMP no. 827                | 32                 | 3.84 ± 0.49  | 3.61 ± 0.19 | 2.65 ± 0.07 | 13.02 ± 0.79 |      |
| CCMP no. 831                | 32                 | 4.20 ± 1.52  | 3.31 ± 0.78 | 4.02 ± 1.89 | 11.40 ± 1.56 |      |
| CCMP no. 831                | 26                 | 4.65 ± 0.26  | 3.28 ± 0.08 | 3.79 ± 0.10 | 19.41 ± 0.74 |      |
| Coral species               |                    |              |             |             |              |      |
| <i>Stylophora</i> sp.       | 26                 | 6.38         | 7.95        | 3.62        | 13.88        | 14.9 |
| <i>Montipora samarensis</i> | 26                 | 19.50        | 16.43       | 2.38        | 5.71         | 32.6 |

Cultures of *Symbiodinium* spp, were grown in F/2 medium under a 10/14-h light/dark cycle and illuminated with 100  $\mu\text{mol quanta m}^{-2}\cdot\text{s}^{-1}$ . The cultures were grown in 26 or 32°C prior to lipid extraction. Lipids were saponified, methylated, and extracted into hexane/methyl tertiary butyl ether as described [Ruess, L., Häggblom, M., Garcia-Zapara, E. & Dighton, J. (2002) *Soil Biol. Biochem.* **34**, 745–756]. Fatty acid methyl esters were analyzed by GC/MS using an Agilent series 6890 GC system and 5973 mass selective detector equipped with an HP5MS capillary column (i.d., 30 m × 0.25 mm; film thickness, 0.25  $\mu\text{m}$ ) with helium as the carrier gas. Data are the fractional percent of each component normalized to the total lipid pool. CCMP, Provasoli-Guillard National Center for Culture of Marine Phytoplankton West Boothbay Harbor, ME); EIL, Elat clone 2.
